# Supplementary material
Source: PubMed Central journal article supplement (PMC4163062)
Supplement: NIHMS571481-supplement-Supp_Table_S1-S3.pdf [file NIHMS571481-supplement-Supp_Table_S1-S3.pdf]

**Table S1.** Genetic variations identified in the *ICAM4* gene

| Pattern | Nucleotide substitution (position) * |            |            |                 |             |            | Number of samples observed (n) |           |                  |
|---------|--------------------------------------|------------|------------|-----------------|-------------|------------|--------------------------------|-----------|------------------|
|         | 5'UTR                                | Exon 1     |            | Intron 1 (IVS1) |             | Exon 2     | Exon 3                         | Caucasian | African American |
|         | -286C>T                              | c.188A>G   | c.299A>G   | IVS1+49A>C      | IVS1+124C>T | c.545G>C   | c.773A>C                       |           |                  |
| 1       | <b>C</b>                             | A          | A          | A               | <b>C</b>    | <b>G</b>   | A                              | 36        | 60               |
| 2       | <b>T</b>                             | A          | A          | A               | <b>C</b>    | <b>G</b>   | A                              | 13        | 1                |
| 3       | <b>C/T</b>                           | A          | A          | A               | <b>C</b>    | <b>G</b>   | A                              | 44        | 22               |
| 4       | <b>C</b>                             | <b>A/G</b> | A          | A               | <b>C</b>    | <b>G</b>   | A                              | 0         | 1                |
| 5       | <b>C</b>                             | A          | A          | <b>A/C</b>      | <b>C</b>    | <b>G</b>   | A                              | 1         | 0                |
| 6       | <b>C</b>                             | A          | A          | A               | <b>C/T</b>  | <b>G</b>   | A                              | 2         | 0                |
| 7       | <b>C</b>                             | A          | A          | A               | <b>C</b>    | <b>G/C</b> | A                              | 0         | 5                |
| 8       | <b>C</b>                             | A          | A          | A               | <b>C</b>    | <b>G</b>   | <b>A/C</b>                     | 1         | 0                |
| 9       | <b>C/T</b>                           | A          | <b>A/G</b> | A               | <b>C</b>    | <b>G</b>   | A                              | 0         | 1                |
| 10      | <b>C/T</b>                           | A          | A          | A               | <b>C</b>    | <b>G/C</b> | A                              | 0         | 1                |
| Total   |                                      |            |            |                 |             |            |                                | 97        | 91               |

\* within 1920 nucleotides of the *ICAM4* gene relative to NCBI Reference Sequence NG\_007728.1. Numbering is according to ICAM4 Isoform 3 (NM\_001039132.2, NP\_001034221.1). Variant nucleotides and heterozygous nucleotide positions are in bold.

**Table S2.** Positions of the non-synonymous genetic variations in the 3 isoforms of the *ICAM4* gene

| Allele*  | dbSNP reference no. | <i>ICAM4</i> cDNA (isoform)     |                                  |                             |
|----------|---------------------|---------------------------------|----------------------------------|-----------------------------|
|          |                     | Isoform Long (1)<br>NM_001544.4 | Isoform Short (2)<br>NM_022377.3 | Isoform 3<br>NM_001039132.2 |
| KF725836 | rs150654072         | c.188A>G (p.Lys63Arg)           | c.188A>G (p.Lys63Arg)            | c.188A>G (p.Lys63Arg)       |
| KF725831 | rs77493670          | c.299A>G (p.Gln100Arg)          | c.299A>G (p.Gln100Arg)           | c.299A>G (p.Gln100Arg)      |
| KF725832 | rs36023325          | c.622G>C (p.Val208Leu)          | c.622G>C (p.Val208Leu)           | c.545G>C (p.Arg182Pro)      |
| KF725833 | rs201399464         | Not present                     | Not present                      | c.773A>C (p.Lys258Thr)      |

\* GenBank nucleotide database accession number

**Table S3.** Variant allele frequencies (VAF) in the populations

| dbSNP<br>reference no. | Donors observed (n) * |                      | VAF observed |            |                   |             | NHLBI ESP<br>VAF (%) |
|------------------------|-----------------------|----------------------|--------------|------------|-------------------|-------------|----------------------|
|                        | Caucasians            | African<br>Americans | Caucasians   |            | African Americans |             |                      |
|                        |                       |                      | Mean †       | 95% CI ‡   | Mean †            | 95% CI ‡    |                      |
| rs3093030              | 57                    | 25                   | 36%          | 25.2-49.8% | 14%               | 7.6 - 23.5% | NA                   |
| rs34385135             | 1                     | 0                    | 1%           | 0.2 - 5.6% | 0%                | 0 - 3.7%    | 1%                   |
| rs35165411             | 2                     | 0                    | 1%           | 0.2 - 5.6% | 0%                | 0 - 3.7%    | 1%                   |
| rs201399464            | 1                     | 0                    | 1%           | 0.2 - 5.6% | 0%                | 0 - 3.7%    | NA                   |
| rs150654072            | 0                     | 1                    | 0%           | 0 - 3.7%   | 1%                | 0.2 - 5.6%  | 0.4%                 |
| rs77493670             | 0                     | 1                    | 0%           | 0 - 3.7%   | 1%                | 0.2 - 5.6%  | 0.04%                |
| rs36023325             | 0                     | 7                    | 0%           | 0 - 3.7%   | 4%                | 1.1 - 9.2%  | 2%                   |

\* All observations were heterozygous with the exception of 13 and 1 homozygous observations for rs3093030 in Caucasians and African Americans, respectively

† (2 x homozygous + 1 x heterozygous)/total number of alleles

‡ 95% confidence interval (CI), Poisson distribution, two sided

NHLBI ESP – NHLBI Exome Sequencing Project (<http://evs.gs.washington.edu/EVS>). Total number of samples in Caucasians = 4300; and total number of samples in African Americans = 2203
